# Supplementary material
Source: publisher site journal article supplement (https://www.spandidos-publications.com/4735/downloadSupplementary)
Supplement: Supplementary file 1 [file downloadSupplementary]

## Sheet: Supplementary Table 1
Table SI. Differentially expressed genes in RIPK3 higher and lower groups from TCGA.
Gene	logFC	AveExpr	t-value	P-value	Adjusted P-value	Trend
RIPK3	1.67526	2.21306	24.0769	4.08e-68	7e-64	Up
TMC8	1.69328	3.01796	14.481	3.06e-35	2.62e-31	Up
NCF1	1.62184	1.94203	14.2535	1.9e-34	1.09e-30	Up
DENND1C	1.52	2.46827	14.0686	8.41e-34	2.64e-30	Up
PTPN6	1.76821	4.19592	14.0567	9.25e-34	2.64e-30	Up
ARHGAP30	1.80425	4.03639	14.1014	6.46e-34	2.64e-30	Up
VAV1	1.89101	3.36399	14.0178	1.26e-33	3.1e-30	Up
FGD3	1.51888	2.57783	13.7597	9.99e-33	2.14e-29	Up
BIN2	1.57299	2.91662	13.7218	1.35e-32	2.16e-29	Up
MYO1F	1.58837	3.54349	13.7091	1.5e-32	2.16e-29	Up
SNX20	1.60379	2.15216	13.7081	1.51e-32	2.16e-29	Up
VAMP8	1.97975	6.73973	13.7422	1.15e-32	2.16e-29	Up
DPEP2	1.19899	1.98276	13.5858	4.01e-32	5.29e-29	Up
LCP2	1.58139	3.66604	13.4515	1.17e-31	1.43e-28	Up
PLCB2	1.38984	3.29396	13.4236	1.46e-31	1.67e-28	Up
SASH3	1.9305	4.15901	13.368	2.28e-31	2.44e-28	Up
CSF2RB	1.51156	3.08448	13.3532	2.56e-31	2.58e-28	Up
GPSM3	1.62277	5.53041	13.3439	2.76e-31	2.63e-28	Up
PTAFR	1.68816	3.33101	13.3332	3e-31	2.71e-28	Up
IL18	1.96499	3.27287	13.2832	4.47e-31	3.83e-28	Up
SIRPB2	1.33095	1.90796	13.2768	4.7e-31	3.84e-28	Up
WAS	1.82928	4.48098	13.1904	9.35e-31	7.28e-28	Up
RASAL3	1.49772	2.97698	13.0775	2.29e-30	1.71e-27	Up
PIK3R5	1.31498	2.40791	13.0331	3.26e-30	2.32e-27	Up
IL10RA	1.87165	4.05113	13.0282	3.39e-30	2.32e-27	Up
GIMAP1	1.38432	3.21968	13.0178	3.68e-30	2.43e-27	Up
HLA-E	1.16428	9.66902	13.0051	4.07e-30	2.58e-27	Up
ARL11	1.22478	1.83899	12.9364	7.01e-30	4.29e-27	Up
FERMT3	1.89108	5.29325	12.9222	7.84e-30	4.63e-27	Up
CYTH4	1.76019	4.02511	12.8818	1.08e-29	6.17e-27	Up
LST1	1.84577	4.08066	12.8659	1.22e-29	6.77e-27	Up
FGD2	1.28256	2.05448	12.823	1.72e-29	9.2e-27	Up
ARHGAP9	1.61608	3.07044	12.7978	2.1e-29	1.06e-26	Up
NCF4	1.96293	4.96634	12.7971	2.11e-29	1.06e-26	Up
GMFG	1.70387	5.78221	12.7798	2.42e-29	1.18e-26	Up
TNFAIP8L2	1.84485	4.18906	12.7268	3.67e-29	1.7e-26	Up
BATF	2.09102	3.60222	12.727	3.66e-29	1.7e-26	Up
ARHGAP45	1.35195	4.51156	12.723	3.78e-29	1.71e-26	Up
P2RY13	1.77032	2.30756	12.7046	4.37e-29	1.92e-26	Up
STAT4	1.12298	1.72637	12.6126	9.03e-29	3.87e-26	Up
HCK	1.89088	4.62674	12.6042	9.64e-29	4.03e-26	Up
RASGRP4	1.18674	2.14372	12.5858	1.11e-28	4.55e-26	Up
BTK	1.43456	2.75975	12.5721	1.24e-28	4.83e-26	Up
SELPLG	1.85808	5.12178	12.574	1.22e-28	4.83e-26	Up
IRF8	1.69936	3.3537	12.4976	2.23e-28	8.49e-26	Up
RBM47	1.3237	2.28969	12.4692	2.79e-28	1.02e-25	Up
CORO1A	1.69585	5.0796	12.4705	2.76e-28	1.02e-25	Up
FYB1	1.71993	3.30196	12.4341	3.67e-28	1.31e-25	Up
CTSS	1.81493	5.88205	12.4261	3.91e-28	1.37e-25	Up
LILRB4	2.02503	3.34122	12.3859	5.35e-28	1.8e-25	Up
CSF3R	1.38597	2.15793	12.378	5.69e-28	1.88e-25	Up
GIMAP4	1.48219	5.76162	12.3742	5.87e-28	1.9e-25	Up
ADAP2	1.59573	4.22216	12.3293	8.34e-28	2.65e-25	Up
C16orf54	1.47204	1.75628	12.3147	9.35e-28	2.91e-25	Up
IL12RB1	1.43039	2.03584	12.2895	1.14e-27	3.42e-25	Up
INPP5D	1.43534	3.56612	12.2899	1.13e-27	3.42e-25	Up
CD33	1.44188	2.30348	12.2684	1.34e-27	3.97e-25	Up
MFNG	1.3178	4.04396	12.2366	1.72e-27	5e-25	Up
AOAH	1.84794	3.59057	12.195	2.38e-27	6.81e-25	Up
LAIR1	1.74592	3.91126	12.1915	2.45e-27	6.88e-25	Up
JAML	1.50988	2.44496	12.1579	3.18e-27	8.8e-25	Up
PARVG	1.38715	2.79753	12.1479	3.44e-27	9.36e-25	Up
LILRB1	1.54321	2.56285	12.1158	4.42e-27	1.18e-24	Up
CYBA	1.6485	6.31221	12.1057	4.78e-27	1.24e-24	Up
LGALS9	1.67049	4.77345	12.1058	4.78e-27	1.24e-24	Up
CD4	1.88009	5.80112	12.1024	4.9e-27	1.25e-24	Up
ITGB2	1.9153	5.6219	12.1002	4.99e-27	1.26e-24	Up
SPI1	1.84463	5.78919	12.0957	5.17e-27	1.28e-24	Up
AIF1	2.04219	6.66893	12.0653	6.55e-27	1.6e-24	Up
TFEC	1.17807	1.7072	12.0295	8.65e-27	2.09e-24	Up
MS4A6A	1.93063	5.17538	12.0253	8.94e-27	2.13e-24	Up
C1orf162	1.73227	4.37531	12.0205	9.28e-27	2.18e-24	Up
DOK2	1.85414	4.51296	12.0181	9.46e-27	2.19e-24	Up
SCIMP	1.33879	1.98679	12.0136	9.79e-27	2.24e-24	Up
CD37	1.50678	3.97937	12.0104	1e-26	2.25e-24	Up
CD53	1.91534	5.83229	12.0096	1.01e-26	2.25e-24	Up
CEACAM21	1.34303	2.05666	11.9864	1.21e-26	2.66e-24	Up
TRPM2	1.43914	2.97605	11.9542	1.55e-26	3.37e-24	Up
GNA15	1.69894	3.86494	11.91	2.19e-26	4.69e-24	Up
PSMB10	1.09085	5.52242	11.8981	2.4e-26	5.08e-24	Up
TMEM273	1.39006	3.01498	11.8964	2.43e-26	5.09e-24	Up
HLA-DMB	1.79099	4.82934	11.8664	3.07e-26	6.26e-24	Up
LTB	2.0902	3.39475	11.8649	3.1e-26	6.26e-24	Up
S1PR4	1.51567	2.26203	11.8619	3.18e-26	6.34e-24	Up
MPEG1	1.84773	5.32538	11.8355	3.9e-26	7.68e-24	Up
SYK	1.55949	4.02041	11.8284	4.12e-26	8.02e-24	Up
CARD9	1.01462	1.92797	11.8005	5.11e-26	9.85e-24	Up
PIK3AP1	1.54405	3.50553	11.7954	5.32e-26	1.01e-23	Up
TBXAS1	1.50745	3.49311	11.7613	6.92e-26	1.3e-23	Up
IL2RG	2.12414	4.02598	11.7519	7.44e-26	1.39e-23	Up
TLR8	1.38636	1.88982	11.7386	8.25e-26	1.51e-23	Up
PSTPIP1	1.62853	2.73659	11.7385	8.26e-26	1.51e-23	Up
ITGAM	1.59558	3.68989	11.7269	9.03e-26	1.63e-23	Up
SLA	1.61561	3.3372	11.6976	1.13e-25	2.02e-23	Up
CYBB	2.09632	5.3803	11.6765	1.33e-25	2.35e-23	Up
GPR65	1.26395	2.04369	11.663	1.48e-25	2.59e-23	Up
PILRA	1.37195	4.18903	11.6531	1.6e-25	2.76e-23	Up
HCLS1	1.65274	5.42307	11.6359	1.82e-25	3.12e-23	Up
GPR132	1.1779	2.08734	11.6243	1.99e-25	3.38e-23	Up
DOCK2	1.37411	2.80579	11.6053	2.31e-25	3.87e-23	Up
IKZF1	1.33553	2.17486	11.5864	2.67e-25	4.44e-23	Up
TMEM150B	1.51614	2.43659	11.5538	3.43e-25	5.65e-23	Up
ARHGAP4	1.29855	4.89221	11.5285	4.16e-25	6.73e-23	Up
LILRB2	1.59914	3.35185	11.5298	4.12e-25	6.73e-23	Up
CD3D	2.36024	3.40079	11.5216	4.39e-25	7.03e-23	Up
GIMAP7	1.58147	5.11039	11.5123	4.71e-25	7.48e-23	Up
LCK	1.85036	2.66986	11.5036	5.04e-25	7.93e-23	Up
SKAP1	1.44606	2.0775	11.4899	5.6e-25	8.72e-23	Up
TNFSF13B	1.69228	3.39058	11.4829	5.91e-25	9.12e-23	Up
FCGR1B	1.15826	1.35882	11.4662	6.72e-25	1.03e-22	Up
LY86	1.62982	4.45512	11.4579	7.16e-25	1.09e-22	Up
SIGLEC1	1.89092	3.95674	11.435	8.53e-25	1.27e-22	Up
CD52	2.16201	4.66705	11.4367	8.42e-25	1.27e-22	Up
LAT2	1.26116	3.38558	11.4294	8.91e-25	1.31e-22	Up
ALOX5	1.62183	3.59377	11.4287	8.95e-25	1.31e-22	Up
EVI2B	1.71765	4.37815	11.4189	9.65e-25	1.4e-22	Up
FMNL1	1.58123	4.38877	11.4053	1.07e-24	1.53e-22	Up
TASL	1.29732	2.25075	11.3996	1.12e-24	1.59e-22	Up
CD247	1.48867	2.029	11.3914	1.19e-24	1.67e-22	Up
LRRC25	1.68682	4.12388	11.3907	1.2e-24	1.67e-22	Up
IGSF6	1.41294	3.65605	11.3794	1.31e-24	1.81e-22	Up
CSF1R	1.94292	6.31372	11.3686	1.42e-24	1.95e-22	Up
MS4A4E	1.00142	1.20776	11.3617	1.49e-24	2.03e-22	Up
ABI3	1.33585	4.24207	11.3513	1.62e-24	2.17e-22	Up
GIMAP8	1.33572	4.03385	11.3422	1.73e-24	2.31e-22	Up
UNC93B1	1.04569	5.07458	11.3265	1.96e-24	2.58e-22	Up
CSF2RA	1.35423	3.03007	11.3228	2.01e-24	2.61e-22	Up
CD2	2.28084	3.56057	11.3235	2e-24	2.61e-22	Up
CXCR3	1.82953	2.19894	11.3194	2.06e-24	2.66e-22	Up
DOK3	1.10109	3.27357	11.3048	2.31e-24	2.96e-22	Up
ITGAL	1.68494	3.03889	11.297	2.45e-24	3.11e-22	Up
HLA-DMA	1.7062	6.46207	11.2907	2.57e-24	3.24e-22	Up
SLCO2B1	1.73179	4.60978	11.2855	2.68e-24	3.35e-22	Up
HCST	1.88662	5.2673	11.2326	4e-24	4.97e-22	Up
CD180	1.2728	2.08144	11.2289	4.12e-24	5.08e-22	Up
TYROBP	1.88952	8.09731	11.2224	4.33e-24	5.3e-22	Up
SAMSN1	1.54726	3.32406	11.1923	5.44e-24	6.62e-22	Up
NLRP3	1.13619	2.19202	11.1823	5.88e-24	7.09e-22	Up
SLAMF6	1.59907	2.11802	11.1596	6.98e-24	8.37e-22	Up
C1QA	2.27735	9.50264	11.1255	9.05e-24	1.08e-21	Up
CD86	1.59841	3.85079	11.1031	1.07e-23	1.27e-21	Up
CD14	2.11882	8.2465	11.1005	1.09e-23	1.28e-21	Up
STAB1	1.64192	5.97193	11.095	1.14e-23	1.33e-21	Up
HK3	1.66974	3.01961	11.0823	1.26e-23	1.45e-21	Up
C1QC	2.15525	9.21317	11.061	1.48e-23	1.67e-21	Up
TNFSF8	1.13471	1.86237	11.0555	1.54e-23	1.73e-21	Up
PTPN7	1.48751	2.25163	11.0528	1.57e-23	1.76e-21	Up
FAM78A	1.14906	3.18111	11.0299	1.87e-23	2.08e-21	Up
CCRL2	1.09499	2.20931	10.9951	2.43e-23	2.69e-21	Up
DAPP1	1.17932	1.6275	10.9919	2.49e-23	2.74e-21	Up
MAP4K1	1.37481	2.73266	10.9891	2.54e-23	2.78e-21	Up
TNFRSF1B	1.61275	6.33314	10.9776	2.77e-23	3.01e-21	Up
HAVCR2	1.62245	3.93149	10.9765	2.8e-23	3.02e-21	Up
TYMP	1.66471	6.29725	10.941	3.66e-23	3.89e-21	Up
CD3E	2.10535	3.27667	10.9214	4.24e-23	4.49e-21	Up
GZMA	2.1932	4.31007	10.919	4.32e-23	4.54e-21	Up
CD48	1.74312	3.18049	10.9113	4.57e-23	4.78e-21	Up
NKG7	2.23069	4.73089	10.9011	4.94e-23	5.14e-21	Up
LAPTM5	1.79544	7.66629	10.8912	5.33e-23	5.47e-21	Up
APBB1IP	2.0115	3.97087	10.8918	5.3e-23	5.47e-21	Up
IL16	1.12086	2.61651	10.8533	7.09e-23	7.19e-21	Up
CD300C	1.49768	2.84824	10.8536	7.07e-23	7.19e-21	Up
WDFY4	1.17741	1.8138	10.8313	8.36e-23	8.38e-21	Up
LILRB3	1.04862	1.74809	10.8299	8.45e-23	8.42e-21	Up
RNASE6	1.72901	5.8138	10.8289	8.51e-23	8.43e-21	Up
SLA2	1.36512	1.69926	10.8261	8.69e-23	8.57e-21	Up
CD300A	1.55901	3.93532	10.8162	9.37e-23	9.18e-21	Up
MARCHF1	1.04152	2.39151	10.8104	9.78e-23	9.53e-21	Up
FCER1G	1.85317	7.19144	10.8053	1.02e-22	9.85e-21	Up
FGR	1.16988	2.90599	10.8039	1.03e-22	9.9e-21	Up
CCL4	1.76514	3.41951	10.7965	1.09e-22	1.04e-20	Up
SH2D1A	1.66113	1.83936	10.765	1.38e-22	1.31e-20	Up
ICAM3	1.00442	1.17358	10.7625	1.4e-22	1.33e-20	Up
MYO1G	1.30356	2.1527	10.7251	1.86e-22	1.75e-20	Up
NFAM1	1.31072	3.30202	10.7111	2.06e-22	1.93e-20	Up
TBC1D10C	1.41161	2.29269	10.707	2.13e-22	1.98e-20	Up
DOCK8	1.29358	2.62127	10.7042	2.17e-22	2.01e-20	Up
CASP4	1.04448	4.44228	10.692	2.38e-22	2.19e-20	Up
CD96	1.31789	1.6268	10.6524	3.2e-22	2.92e-20	Up
C1QB	2.24891	9.05856	10.653	3.18e-22	2.92e-20	Up
C3AR1	1.63323	5.14396	10.6412	3.48e-22	3.16e-20	Up
KCNQ1	1.13813	3.56038	10.6383	3.55e-22	3.21e-20	Up
PTPRC	1.64469	3.55648	10.6185	4.12e-22	3.7e-20	Up
NPL	1.3179	3.86735	10.6116	4.34e-22	3.87e-20	Up
CALHM6	1.89391	4.39499	10.61	4.39e-22	3.9e-20	Up
MS4A4A	1.88057	5.26955	10.6088	4.43e-22	3.92e-20	Up
GIMAP6	1.33606	4.39377	10.5994	4.75e-22	4.18e-20	Up
MS4A7	1.68163	4.76123	10.5702	5.91e-22	5.17e-20	Up
GGTA1	1.55418	4.05922	10.5634	6.22e-22	5.41e-20	Up
PRF1	1.76008	3.46655	10.5531	6.71e-22	5.81e-20	Up
SP140	1.16758	1.46655	10.5306	7.94e-22	6.84e-20	Up
CSF1	1.56264	6.06933	10.5205	8.56e-22	7.34e-20	Up
UBASH3A	1.24493	1.21415	10.5139	8.99e-22	7.67e-20	Up
SIGLEC7	1.30677	2.29443	10.4762	1.19e-21	1.01e-19	Up
P2RY8	1.26639	2.69531	10.4683	1.26e-21	1.07e-19	Up
DEF6	1.30842	4.37448	10.4414	1.54e-21	1.29e-19	Up
TIGIT	1.47666	1.4801	10.4327	1.64e-21	1.37e-19	Up
CTSW	1.84327	3.3019	10.4244	1.75e-21	1.44e-19	Up
CTSC	1.56753	5.29471	10.4139	1.89e-21	1.54e-19	Up
RASSF4	1.3133	4.05995	10.4043	2.03e-21	1.64e-19	Up
CD8B	1.83578	2.05483	10.4049	2.02e-21	1.64e-19	Up
CCR5	1.6291	2.57915	10.3987	2.11e-21	1.7e-19	Up
FCGR1A	1.64265	3.06169	10.3955	2.17e-21	1.73e-19	Up
CD3G	1.35172	1.37219	10.381	2.41e-21	1.92e-19	Up
MYO7A	1.1516	2.18955	10.3515	3e-21	2.37e-19	Up
SIRPG	1.66622	1.69639	10.3504	3.02e-21	2.38e-19	Up
GNGT2	1.17197	2.10396	10.3192	3.81e-21	2.97e-19	Up
GZMK	2.05118	2.81463	10.319	3.81e-21	2.97e-19	Up
CASP1	1.30323	4.07203	10.314	3.95e-21	3.07e-19	Up
RHOH	1.16515	1.40198	10.3083	4.12e-21	3.19e-19	Up
CD84	1.34456	2.64084	10.3062	4.19e-21	3.22e-19	Up
GPR34	1.53703	4.3935	10.2943	4.58e-21	3.5e-19	Up
ZAP70	1.37203	1.85804	10.285	4.9e-21	3.73e-19	Up
CD200R1	1.1408	1.80381	10.2808	5.05e-21	3.83e-19	Up
SLAMF1	1.12022	1.1822	10.2752	5.27e-21	3.98e-19	Up
VSIR	1.46389	5.77382	10.2689	5.51e-21	4.15e-19	Up
SIGLEC9	1.36853	2.62584	10.2678	5.56e-21	4.16e-19	Up
CLEC4A	1.17099	3.45431	10.2554	6.09e-21	4.52e-19	Up
RAC2	1.6407	5.24284	10.2213	7.83e-21	5.79e-19	Up
DENND2D	1.22577	2.74799	10.1982	9.29e-21	6.83e-19	Up
LYL1	1.04999	3.65295	10.1938	9.59e-21	7.03e-19	Up
CLEC7A	1.342	2.58681	10.1875	1e-20	7.33e-19	Up
CARD11	1.28848	2.16976	10.1847	1.03e-20	7.45e-19	Up
TLR2	1.28642	3.6928	10.1764	1.09e-20	7.85e-19	Up
CD74	1.83338	10.6492	10.1766	1.09e-20	7.85e-19	Up
NCR3	1.12136	1.27032	10.1587	1.24e-20	8.9e-19	Up
PYHIN1	1.25485	1.28028	10.1465	1.36e-20	9.67e-19	Up
CCL5	2.27296	5.75274	10.1462	1.36e-20	9.67e-19	Up
IKZF3	1.46787	1.64194	10.1407	1.42e-20	1e-18	Up
CD38	1.36382	1.73006	10.1354	1.47e-20	1.04e-18	Up
SELL	1.63088	3.07124	10.1015	1.89e-20	1.32e-18	Up
CLEC10A	1.891	3.18726	10.1016	1.89e-20	1.32e-18	Up
ADAP1	1.01058	1.8372	10.0811	2.19e-20	1.52e-18	Up
ADA2	1.51686	4.70722	10.0801	2.21e-20	1.53e-18	Up
CCR1	1.60722	4.13485	10.0777	2.25e-20	1.55e-18	Up
HLA-DPB1	1.7137	8.0232	10.0747	2.3e-20	1.57e-18	Up
THEMIS2	1.42648	4.67083	10.0397	2.97e-20	2.02e-18	Up
RHBDF2	1.0827	3.77316	10.0336	3.1e-20	2.09e-18	Up
CFP	1.16515	1.72481	10.0284	3.22e-20	2.17e-18	Up
APOBR	1.29469	2.96741	10.0193	3.44e-20	2.31e-18	Up
VNN1	1.31879	1.83931	10.0181	3.47e-20	2.32e-18	Up
CXCR6	1.38702	1.78727	10.0146	3.56e-20	2.37e-18	Up
APOBEC3H	1.13388	1.50552	10.0084	3.73e-20	2.47e-18	Up
NRROS	1.21345	3.96243	9.9994	3.98e-20	2.62e-18	Up
TMEM37	1.35737	4.05859	9.99574	4.09e-20	2.68e-18	Up
IL2RA	1.93975	2.90594	9.99331	4.16e-20	2.72e-18	Up
SLAMF7	1.77162	2.31478	9.98904	4.29e-20	2.8e-18	Up
HSH2D	1.18636	1.2539	9.97751	4.67e-20	3.02e-18	Up
TMEM97	-1.10671	4.92628	-9.94051	6.11e-20	3.91e-18	Down
CD27	1.8007	2.76469	9.93167	6.51e-20	4.15e-18	Up
CD163	1.94437	5.922	9.92095	7.04e-20	4.47e-18	Up
VSIG4	2.05132	6.10844	9.89481	8.51e-20	5.37e-18	Up
CST7	1.95373	4.1457	9.88979	8.83e-20	5.53e-18	Up
HLA-DRB1	1.85512	9.73401	9.87221	1e-19	6.25e-18	Up
SPN	1.27275	1.80322	9.86092	1.09e-19	6.76e-18	Up
VNN2	1.4102	1.91452	9.85777	1.11e-19	6.89e-18	Up
IRF5	1.14891	3.18985	9.83762	1.29e-19	7.95e-18	Up
FASLG	1.23182	1.22293	9.83515	1.31e-19	8.06e-18	Up
GIMAP2	1.09107	3.96016	9.82024	1.46e-19	8.92e-18	Up
FUCA1	1.03978	6.44824	9.80882	1.59e-19	9.65e-18	Up
CCDC88B	1.13543	2.90449	9.79385	1.77e-19	1.07e-17	Up
TRAF3IP3	1.09331	1.5441	9.79232	1.79e-19	1.08e-17	Up
CD5	1.44136	2.08124	9.72987	2.81e-19	1.69e-17	Up
GZMH	1.74857	2.81393	9.72176	2.98e-19	1.78e-17	Up
FBP1	1.6079	3.46035	9.70214	3.43e-19	2.04e-17	Up
SIT1	1.56506	2.48945	9.66822	4.37e-19	2.59e-17	Up
EBI3	1.60901	3.56365	9.65427	4.83e-19	2.86e-17	Up
SRGN	1.6155	7.9979	9.64474	5.18e-19	3.05e-17	Up
SLC15A3	1.05394	4.89766	9.63828	5.42e-19	3.18e-17	Up
UCP2	1.23281	6.00017	9.62029	6.17e-19	3.59e-17	Up
MILR1	1.39708	3.66456	9.62021	6.17e-19	3.59e-17	Up
FPR1	1.81786	3.537	9.60232	7.02e-19	4.06e-17	Up
CD72	1.33025	3.14088	9.59481	7.4e-19	4.27e-17	Up
ICOS	1.09846	1.01873	9.56385	9.24e-19	5.3e-17	Up
NCKAP1L	1.40396	3.78569	9.54787	1.04e-18	5.92e-17	Up
SOWAHD	1.00514	1.69985	9.518	1.28e-18	7.28e-17	Up
HLA-DRA	1.82896	10.2427	9.51195	1.34e-18	7.57e-17	Up
TSPAN33	1.45071	4.67087	9.49779	1.48e-18	8.35e-17	Up
CCL3	1.60395	3.71414	9.49722	1.49e-18	8.35e-17	Up
ADAM28	1.0684	1.59107	9.49559	1.5e-18	8.42e-17	Up
CCL8	1.83387	3.48209	9.48642	1.61e-18	8.96e-17	Up
SIGLEC14	1.32903	2.34801	9.47204	1.78e-18	9.87e-17	Up
FOLR2	1.88371	7.13075	9.46707	1.84e-18	1.02e-16	Up
CCL4L2	1.51925	2.80834	9.46235	1.91e-18	1.05e-16	Up
TESPA1	1.10597	1.30207	9.44467	2.16e-18	1.19e-16	Up
ALOX5AP	1.68583	4.60549	9.44153	2.21e-18	1.21e-16	Up
TLR7	1.19041	2.36931	9.43437	2.32e-18	1.27e-16	Up
XCL2	1.47982	1.98778	9.41591	2.65e-18	1.44e-16	Up
RNASET2	1.01498	4.45173	9.40814	2.8e-18	1.51e-16	Up
GZMM	1.42568	2.76512	9.38798	3.23e-18	1.74e-16	Up
PYCARD	1.13342	5.30654	9.37762	3.48e-18	1.86e-16	Up
NCF2	1.31362	4.32397	9.37062	3.65e-18	1.94e-16	Up
RGS18	1.09495	1.9479	9.35943	3.95e-18	2.08e-16	Up
CLEC12A	1.09669	1.30477	9.35753	4.01e-18	2.1e-16	Up
HLA-B	1.23013	10.8158	9.35685	4.03e-18	2.1e-16	Up
XCL1	1.09407	1.4902	9.35408	4.11e-18	2.14e-16	Up
LPAR5	1.16994	2.4831	9.31623	5.37e-18	2.79e-16	Up
KLRB1	1.33112	2.47004	9.31221	5.52e-18	2.86e-16	Up
ACAP1	1.00563	2.61074	9.30104	5.97e-18	3.08e-16	Up
TBX21	1.02668	1.32312	9.28932	6.49e-18	3.34e-16	Up
CTSZ	1.12968	9.03354	9.28641	6.62e-18	3.4e-16	Up
CD163L1	1.44532	2.85871	9.28497	6.69e-18	3.42e-16	Up
CCR2	1.18755	1.67178	9.27577	7.14e-18	3.64e-16	Up
SLAMF8	1.67618	4.01882	9.2673	7.58e-18	3.85e-16	Up
LYN	1.13386	4.23758	9.23065	9.81e-18	4.94e-16	Up
TMC6	1.07685	3.45516	9.22944	9.89e-18	4.97e-16	Up
CCL23	1.31571	1.5333	9.22209	1.04e-17	5.22e-16	Up
SLC49A3	1.0847	3.06208	9.22054	1.05e-17	5.26e-16	Up
LCP1	1.47709	5.92325	9.19516	1.26e-17	6.27e-16	Up
CXCL16	1.07773	5.68193	9.15321	1.69e-17	8.37e-16	Up
HLA-DPA1	1.66195	6.95023	9.14374	1.8e-17	8.91e-16	Up
SH3TC1	1.06247	3.14595	9.1423	1.82e-17	8.98e-16	Up
CD69	1.37149	2.2432	9.13824	1.87e-17	9.18e-16	Up
CPVL	1.41454	5.38292	9.13854	1.87e-17	9.18e-16	Up
KCNJ5	1.08716	2.46821	9.11839	2.15e-17	1.05e-15	Up
CD6	1.25643	1.8929	9.11656	2.18e-17	1.06e-15	Up
CCR7	1.34038	1.94235	9.11227	2.25e-17	1.08e-15	Up
CD8A	1.81856	2.8659	9.11245	2.25e-17	1.08e-15	Up
IL2RB	1.37168	3.11217	9.06609	3.1e-17	1.48e-15	Up
CR1	1.20798	1.38758	9.06213	3.19e-17	1.52e-15	Up
FPR3	1.42221	4.60396	9.04646	3.56e-17	1.69e-15	Up
LGMN	1.09424	7.60024	9.01758	4.35e-17	2.06e-15	Up
VENTX	1.03547	1.81658	9.01535	4.42e-17	2.09e-15	Up
ARHGAP15	1.08843	2.25869	8.9996	4.93e-17	2.31e-15	Up
SERPINA1	1.72484	4.11419	8.97944	5.67e-17	2.64e-15	Up
SIGLEC11	1.17001	1.45469	8.97734	5.75e-17	2.67e-15	Up
PLEK	1.67353	4.93885	8.97103	6.01e-17	2.78e-15	Up
CD300LF	1.11438	2.06571	8.96764	6.15e-17	2.83e-15	Up
ZNF683	1.1071	1.2342	8.95669	6.63e-17	3.05e-15	Up
S100A9	2.14927	6.26929	8.91521	8.84e-17	4.01e-15	Up
MSR1	1.33376	4.00034	8.90288	9.62e-17	4.35e-15	Up
FCGR3A	1.87989	6.047	8.83896	1.5e-16	6.68e-15	Up
LGALS2	1.49429	2.8804	8.83537	1.53e-16	6.82e-15	Up
RNASE1	1.76503	9.1804	8.82308	1.67e-16	7.39e-15	Up
CRTAM	1.16362	1.49702	8.80017	1.95e-16	8.6e-15	Up
C3	2.83268	5.50432	8.79787	1.98e-16	8.72e-15	Up
MRC1	1.78182	4.75947	8.79638	2e-16	8.78e-15	Up
LILRB5	1.51127	2.82468	8.7808	2.23e-16	9.75e-15	Up
VAMP5	1.09309	7.86364	8.77935	2.25e-16	9.82e-15	Up
SERPING1	1.63806	8.39372	8.77823	2.27e-16	9.87e-15	Up
CYTIP	1.31346	2.73325	8.77642	2.3e-16	9.97e-15	Up
ZNF385A	1.1962	5.79244	8.76212	2.53e-16	1.09e-14	Up
DAB2	1.40509	6.27134	8.75946	2.58e-16	1.11e-14	Up
DRAM1	1.25095	5.16759	8.73118	3.13e-16	1.34e-14	Up
GBP5	1.66664	2.71715	8.71775	3.43e-16	1.47e-14	Up
P2RY6	1.17912	2.49808	8.68999	4.15e-16	1.76e-14	Up
PIK3CD	1.14099	3.69367	8.6625	5e-16	2.1e-14	Up
HLA-C	1.04663	10.2793	8.66098	5.05e-16	2.12e-14	Up
FCGR2A	1.32707	5.07104	8.63516	6.03e-16	2.51e-14	Up
APOL3	1.53447	4.81981	8.63505	6.03e-16	2.51e-14	Up
CD209	1.95512	4.12322	8.62053	6.65e-16	2.76e-14	Up
SH2D2A	1.19511	2.6881	8.61495	6.91e-16	2.86e-14	Up
PDE6G	1.04163	1.73409	8.59885	7.71e-16	3.18e-14	Up
CD28	1.10821	2.37702	8.59667	7.82e-16	3.22e-14	Up
FCGR2B	1.28454	2.28293	8.58982	8.2e-16	3.36e-14	Up
STXBP2	1.09594	3.21865	8.5893	8.22e-16	3.37e-14	Up
HAS1	2.29178	2.375	8.58666	8.37e-16	3.42e-14	Up
SH3BGRL3	1.15823	8.92717	8.57759	8.9e-16	3.62e-14	Up
HLA-DOA	1.51213	4.26443	8.56497	9.7e-16	3.92e-14	Up
TAGAP	1.22968	2.38186	8.56337	9.8e-16	3.95e-14	Up
GPR84	1.17453	1.86477	8.54295	1.13e-15	4.53e-14	Up
P2RY10	1.02758	1.19232	8.5353	1.19e-15	4.75e-14	Up
STAC3	1.27775	3.55577	8.53505	1.19e-15	4.75e-14	Up
CETP	1.49718	3.19339	8.53484	1.19e-15	4.75e-14	Up
GPR171	1.09376	1.40586	8.52239	1.29e-15	5.14e-14	Up
RAB20	1.08119	5.45539	8.51809	1.33e-15	5.28e-14	Up
IL32	1.45114	5.56925	8.48151	1.7e-15	6.67e-14	Up
CCL3L1	1.15998	2.1431	8.47536	1.78e-15	6.93e-14	Up
PDCD1	1.48735	1.94229	8.45781	2e-15	7.77e-14	Up
FLVCR2	1.04581	2.48949	8.43664	2.3e-15	8.91e-14	Up
SLC7A7	1.04611	4.1029	8.42717	2.45e-15	9.48e-14	Up
CXCL9	2.38293	4.20101	8.42529	2.49e-15	9.57e-14	Up
CD40	1.16963	4.77249	8.42443	2.5e-15	9.61e-14	Up
SIGLEC10	1.2556	2.33078	8.41848	2.6e-15	9.95e-14	Up
JCHAIN	2.6379	3.58989	8.41809	2.61e-15	9.96e-14	Up
LYZ	1.86722	6.3991	8.40439	2.86e-15	1.08e-13	Up
MNDA	1.41938	3.9509	8.40006	2.94e-15	1.11e-13	Up
FCN1	1.48141	2.33273	8.40058	2.93e-15	1.11e-13	Up
SLC37A2	1.2471	3.03886	8.39884	2.97e-15	1.12e-13	Up
ST14	1.22524	2.93391	8.39553	3.03e-15	1.14e-13	Up
MAP3K8	1.05173	3.29873	8.38792	3.19e-15	1.19e-13	Up
FOXP3	1.03593	2.06342	8.38224	3.32e-15	1.24e-13	Up
F13A1	2.03223	6.21308	8.38038	3.36e-15	1.25e-13	Up
MZB1	1.81644	1.7174	8.36217	3.79e-15	1.41e-13	Up
CLEC4E	1.26738	1.83398	8.34576	4.23e-15	1.56e-13	Up
RENBP	1.29506	4.8228	8.33268	4.62e-15	1.7e-13	Up
TNFSF10	1.40781	5.39434	8.33322	4.6e-15	1.7e-13	Up
HLA-DQA1	1.76057	5.14622	8.32734	4.78e-15	1.76e-13	Up
CTLA4	1.1831	1.56422	8.30682	5.48e-15	2e-13	Up
ANKRD22	1.5316	1.96451	8.3048	5.56e-15	2.02e-13	Up
HLA-DRB5	1.77055	7.93902	8.30224	5.65e-15	2.05e-13	Up
CXCL10	2.07523	4.94769	8.27178	6.92e-15	2.49e-13	Up
S100A4	2.04356	8.65583	8.26301	7.34e-15	2.63e-13	Up
LSP1	1.70221	5.98323	8.25727	7.62e-15	2.72e-13	Up
CFD	2.36143	6.1818	8.24959	8.02e-15	2.86e-13	Up
CIITA	1.12505	2.41157	8.2413	8.47e-15	3.01e-13	Up
ACSL5	1.14319	3.87688	8.23462	8.86e-15	3.13e-13	Up
EOMES	1.08104	1.40329	8.2315	9.04e-15	3.19e-13	Up
CMTM7	1.07315	4.17761	8.21581	1e-14	3.53e-13	Up
CD68	1.06	2.0982	8.21035	1.04e-14	3.65e-13	Up
CXCL11	1.6393	2.54326	8.19892	1.12e-14	3.92e-13	Up
JAK3	1.26735	3.28029	8.19369	1.16e-14	4.05e-13	Up
CRYBB1	1.12459	2.48497	8.19123	1.18e-14	4.11e-13	Up
CMKLR1	1.47098	4.61061	8.16954	1.36e-14	4.73e-13	Up
C2	1.66655	4.77677	8.15314	1.52e-14	5.24e-13	Up
MEDAG	2.22147	5.01169	8.14221	1.63e-14	5.62e-13	Up
PLTP	1.77938	8.54224	8.13851	1.67e-14	5.75e-13	Up
CSTA	1.4093	3.09181	8.13214	1.74e-14	5.96e-13	Up
CCL13	2.24058	3.49134	8.13046	1.76e-14	6.02e-13	Up
FUOM	1.11392	4.16967	8.11387	1.96e-14	6.67e-13	Up
GZMB	1.35469	2.55581	8.10134	2.13e-14	7.2e-13	Up
IL21R	1.21548	1.71648	8.09014	2.3e-14	7.72e-13	Up
ETV7	1.15661	2.38738	8.01325	3.79e-14	1.25e-12	Up
TNFRSF18	1.23764	2.35249	8.01192	3.83e-14	1.26e-12	Up
PLA2G2D	1.78685	1.47517	7.96363	5.24e-14	1.71e-12	Up
HLA-DQB1	1.63627	5.85129	7.95205	5.65e-14	1.83e-12	Up
C1S	1.51448	8.02397	7.93377	6.36e-14	2.05e-12	Up
BATF2	1.28041	2.85179	7.92288	6.83e-14	2.19e-12	Up
IL15RA	1.28207	3.91064	7.92044	6.94e-14	2.22e-12	Up
IRF1	1.00738	4.78543	7.91149	7.35e-14	2.35e-12	Up
APOL1	1.47718	7.05466	7.89067	8.41e-14	2.67e-12	Up
TNFAIP2	1.27055	6.17002	7.87956	9.04e-14	2.85e-12	Up
HLA-F	1.07265	5.69587	7.8401	1.17e-13	3.63e-12	Up
RCSD1	1.06379	3.67779	7.82958	1.25e-13	3.87e-12	Up
PM20D2	-1.07004	3.92424	-7.82175	1.31e-13	4.05e-12	Down
IL7R	1.4083	2.55865	7.76735	1.86e-13	5.68e-12	Up
ADAM11	-1.05986	1.74249	-7.76177	1.93e-13	5.88e-12	Down
CXCL13	1.97679	2.56371	7.75864	1.97e-13	5.97e-12	Up
LILRA5	1.15135	2.27978	7.74654	2.12e-13	6.41e-12	Up
UBD	1.59589	1.75059	7.74321	2.17e-13	6.54e-12	Up
MARCO	2.36801	3.06182	7.71452	2.61e-13	7.8e-12	Up
TRIM45	-1.15235	3.18867	-7.70387	2.79e-13	8.32e-12	Down
CD79A	1.49402	1.87168	7.69372	2.98e-13	8.84e-12	Up
GNLY	1.09188	2.1866	7.66668	3.53e-13	1.04e-11	Up
C1R	1.27949	8.449	7.6583	3.73e-13	1.1e-11	Up
GBP4	1.30267	4.28747	7.62491	4.61e-13	1.34e-11	Up
GGT5	1.37494	4.18383	7.62488	4.61e-13	1.34e-11	Up
FAM20A	1.45336	4.12405	7.61193	5e-13	1.45e-11	Up
RNASE2	1.34968	2.21048	7.58675	5.86e-13	1.69e-11	Up
CD7	1.37337	3.09237	7.52862	8.46e-13	2.38e-11	Up
CCL2	1.50844	5.54405	7.517	9.1e-13	2.54e-11	Up
ADGRL1	-1.24783	4.87155	-7.50603	9.75e-13	2.7e-11	Down
DACT3	-1.68805	4.35815	-7.50334	9.91e-13	2.74e-11	Down
PSMB9	1.06929	5.73803	7.49811	1.02e-12	2.82e-11	Up
RARRES1	1.80748	4.0656	7.49823	1.02e-12	2.82e-11	Up
CYB561	1.02519	4.70739	7.45837	1.31e-12	3.59e-11	Up
ADAMDEC1	1.62198	2.05644	7.42739	1.59e-12	4.32e-11	Up
METRNL	1.37219	6.86675	7.41773	1.69e-12	4.56e-11	Up
HLA-DQB2	1.70716	3.52599	7.41146	1.76e-12	4.74e-11	Up
KLHL42	-1.00426	4.63155	-7.40753	1.8e-12	4.83e-11	Down
TXNDC16	-1.04356	3.61481	-7.39325	1.97e-12	5.26e-11	Down
SECTM1	1.16779	5.11279	7.37281	2.24e-12	5.94e-11	Up
HPGDS	1.19784	2.88884	7.36895	2.29e-12	6.05e-11	Up
WARS1	1.00092	6.67894	7.36554	2.34e-12	6.17e-11	Up
EVI2A	1.33788	4.34571	7.3641	2.36e-12	6.21e-11	Up
IFI27	1.46321	6.48496	7.35164	2.55e-12	6.66e-11	Up
ITGAX	1.07023	2.93028	7.34699	2.63e-12	6.82e-11	Up
PLA2G2A	2.96615	3.75685	7.32218	3.06e-12	7.87e-11	Up
MTSS2	-1.00851	4.61066	-7.31812	3.14e-12	8.06e-11	Down
MPP2	-1.19407	3.05774	-7.29493	3.62e-12	9.19e-11	Down
OR2I1P	1.50599	1.62458	7.27204	4.17e-12	1.05e-10	Up
ADGRB2	-1.3944	3.72496	-7.26957	4.23e-12	1.07e-10	Down
TLR4	1.09107	3.89274	7.23467	5.25e-12	1.31e-10	Up
CCL19	1.96312	2.88342	7.20043	6.47e-12	1.6e-10	Up
PPFIA4	-1.30873	1.9323	-7.19875	6.54e-12	1.61e-10	Down
BCL2A1	1.32158	2.61199	7.17463	7.57e-12	1.85e-10	Up
IL4I1	1.21467	3.87374	7.17083	7.75e-12	1.89e-10	Up
ST3GAL5	1.00914	3.4611	7.1618	8.19e-12	1.99e-10	Up
IGLL5	1.96417	1.99011	7.14044	9.33e-12	2.26e-10	Up
ATAD2	-1.05087	4.71987	-7.13028	9.92e-12	2.39e-10	Down
HMGN5	-1.14209	4.12897	-7.11305	1.1e-11	2.63e-10	Down
RASL10B	-1.17262	2.29634	-7.10134	1.18e-11	2.81e-10	Down
CACNA1C	-1.30374	3.07716	-7.0904	1.26e-11	2.99e-10	Down
HLA-DOB	1.04064	1.93562	7.08081	1.34e-11	3.15e-10	Up
ATP9A	-1.2007	4.67243	-7.04783	1.63e-11	3.83e-10	Down
FGFR2	-1.69492	3.25268	-7.04245	1.69e-11	3.94e-10	Down
CLEC3B	2.01535	6.11212	7.02374	1.89e-11	4.39e-10	Up
RBM24	-2.05764	2.90559	-7.01296	2.02e-11	4.67e-10	Down
CST3	1.01648	8.85837	7.00126	2.16e-11	4.99e-10	Up
BRIP1	-1.02382	2.82942	-7.00061	2.17e-11	5e-10	Down
KLHL23	-1.44366	3.30639	-6.99527	2.24e-11	5.13e-10	Down
S100A8	1.546	3.34044	6.99037	2.31e-11	5.25e-10	Up
TMIGD3	1.01755	3.0956	6.96834	2.63e-11	5.94e-10	Up
SMPDL3A	1.06161	4.04831	6.96481	2.69e-11	6.05e-10	Up
PHKA1	-1.24502	2.67085	-6.94879	2.96e-11	6.6e-10	Down
CBX2	-1.07529	3.3613	-6.94705	2.99e-11	6.65e-10	Down
EMB	1.12241	3.93946	6.94335	3.06e-11	6.79e-10	Up
ACVRL1	1.17659	5.34975	6.9414	3.09e-11	6.86e-10	Up
CCL17	1.21223	1.63935	6.93869	3.15e-11	6.96e-10	Up
IDO1	1.71827	3.69519	6.9358	3.2e-11	7.07e-10	Up
OSCAR	1.06281	3.05656	6.93109	3.29e-11	7.23e-10	Up
AQP3	1.20083	2.86899	6.9243	3.43e-11	7.52e-10	Up
CTSV	-1.26824	1.55578	-6.90787	3.78e-11	8.21e-10	Down
METTL7B	1.36932	3.17396	6.90531	3.84e-11	8.32e-10	Up
SLC16A9	-1.14355	2.09345	-6.88592	4.31e-11	9.26e-10	Down
SEMA6A	-1.20722	2.82902	-6.87952	4.47e-11	9.6e-10	Down
CAP2	-1.82861	3.63221	-6.8607	5e-11	1.07e-09	Down
EPSTI1	1.01232	3.86966	6.85071	5.31e-11	1.12e-09	Up
C1QL4	-1.7126	2.12003	-6.84175	5.6e-11	1.18e-09	Down
TRIM9	-1.09449	2.13127	-6.83294	5.9e-11	1.24e-09	Down
IFITM1	1.1515	7.8184	6.82854	6.05e-11	1.27e-09	Up
ARHGEF26	-1.23239	2.7598	-6.82555	6.16e-11	1.29e-09	Down
C5AR1	1.07944	4.70921	6.82407	6.21e-11	1.3e-09	Up
ANPEP	1.87913	4.95607	6.81874	6.41e-11	1.34e-09	Up
TMEM25	-1.15389	3.12673	-6.80582	6.92e-11	1.44e-09	Down
CNIH2	-1.04558	2.65406	-6.77899	8.1e-11	1.66e-09	Down
PLAU	1.46436	6.60358	6.77419	8.33e-11	1.71e-09	Up
CENPV	-1.11886	4.30647	-6.76921	8.58e-11	1.75e-09	Down
HSD3B7	1.09939	5.2623	6.75743	9.2e-11	1.86e-09	Up
DPYSL5	-1.36555	1.14747	-6.7513	9.53e-11	1.92e-09	Down
DIRAS1	-1.83641	3.42113	-6.73951	1.02e-10	2.04e-09	Down
TUB	-1.28364	3.64994	-6.69189	1.35e-10	2.66e-09	Down
SLC6A8	-1.18374	5.29261	-6.66926	1.54e-10	2.98e-09	Down
COL4A5	-1.84727	2.95195	-6.66147	1.61e-10	3.1e-09	Down
C6orf132	1.28189	1.96775	6.64386	1.78e-10	3.41e-09	Up
ZNF711	-1.46531	3.0649	-6.62966	1.94e-10	3.69e-09	Down
TMEM176B	1.41384	7.71497	6.62778	1.96e-10	3.72e-09	Up
FBLN2	1.94059	6.61436	6.62401	2e-10	3.79e-09	Up
SBSPON	-2.21698	3.51892	-6.62277	2.02e-10	3.81e-09	Down
APOL4	1.25205	3.3743	6.61695	2.08e-10	3.93e-09	Up
OXCT1	-1.01791	5.68156	-6.61177	2.15e-10	4.03e-09	Down
SETBP1	-1.04741	3.32218	-6.60197	2.27e-10	4.25e-09	Down
STON1	-1.0924	3.32143	-6.59538	2.36e-10	4.38e-09	Down
ITGA8	-2.13472	3.5621	-6.59315	2.39e-10	4.43e-09	Down
PDZRN3	-1.33347	4.93815	-6.58489	2.51e-10	4.62e-09	Down
RIPPLY3	-1.00362	1.17246	-6.58053	2.57e-10	4.73e-09	Down
CXCL1	1.59179	2.28547	6.5773	2.62e-10	4.8e-09	Up
CDC42EP2	1.02301	5.02288	6.56444	2.82e-10	5.13e-09	Up
DKK1	2.13206	3.00728	6.56049	2.89e-10	5.23e-09	Up
RAMP3	1.06946	5.21791	6.5587	2.92e-10	5.28e-09	Up
LXN	1.18745	4.93566	6.55509	2.98e-10	5.39e-09	Up
LONRF2	-1.51012	2.12389	-6.54853	3.09e-10	5.58e-09	Down
ADAM22	-1.40994	2.47563	-6.53729	3.3e-10	5.91e-09	Down
KLHDC7B	1.40324	2.62992	6.51771	3.69e-10	6.53e-09	Up
RIMS2	-1.19924	1.19696	-6.51059	3.84e-10	6.76e-09	Down
NINJ2	1.0619	3.17134	6.4929	4.25e-10	7.43e-09	Up
TIMD4	1.3405	1.62737	6.48853	4.36e-10	7.59e-09	Up
C1QL1	-1.7792	5.02754	-6.4865	4.41e-10	7.67e-09	Down
OSM	1.012	2.19998	6.46371	5.02e-10	8.61e-09	Up
SPEG	-1.67612	3.39329	-6.45318	5.33e-10	9.07e-09	Down
TLCD4	-1.1062	2.46866	-6.4334	5.97e-10	1.01e-08	Down
IGFBP6	1.59262	7.16364	6.42904	6.12e-10	1.03e-08	Up
CD79B	1.01851	3.10614	6.42766	6.17e-10	1.04e-08	Up
PRPH	-1.44327	1.47147	-6.41097	6.78e-10	1.13e-08	Down
VASN	1.08809	7.01225	6.40452	7.03e-10	1.17e-08	Up
HTRA3	1.95388	6.70231	6.40237	7.12e-10	1.18e-08	Up
SALL2	-1.21053	3.11327	-6.39627	7.37e-10	1.22e-08	Down
CA9	-1.89218	3.04386	-6.38895	7.68e-10	1.27e-08	Down
CLEC4G	1.47863	1.97477	6.37458	8.33e-10	1.36e-08	Up
MEIS2	-1.0928	3.49972	-6.36423	8.83e-10	1.43e-08	Down
CIB2	-1.0252	3.94695	-6.36047	9.02e-10	1.46e-08	Down
ISOC1	-1.12158	5.7834	-6.35699	9.19e-10	1.49e-08	Down
TPD52L1	-1.4303	3.13668	-6.34853	9.64e-10	1.55e-08	Down
ITPR1	-1.35063	3.8869	-6.32206	1.12e-09	1.78e-08	Down
APOC1	1.56377	5.86394	6.32239	1.12e-09	1.78e-08	Up
OAS1	1.03587	4.38105	6.31159	1.19e-09	1.87e-08	Up
TMEM179	-1.47343	1.98294	-6.30206	1.25e-09	1.95e-08	Down
MMP19	1.24761	3.41265	6.28413	1.38e-09	2.14e-08	Up
ICAM1	1.02895	5.2576	6.26803	1.51e-09	2.32e-08	Up
SLC25A23	-1.2328	4.93607	-6.25691	1.61e-09	2.45e-08	Down
PAPSS2	1.20735	4.74054	6.24282	1.74e-09	2.62e-08	Up
CRMP1	-1.03764	4.75074	-6.22033	1.97e-09	2.95e-08	Down
APOE	1.5389	8.70083	6.2179	2e-09	2.98e-08	Up
PTGES	1.81667	5.46254	6.21565	2.03e-09	3.01e-08	Up
SV2A	-1.43229	4.12192	-6.2029	2.17e-09	3.21e-08	Down
PROCR	1.05749	6.55839	6.19499	2.27e-09	3.35e-08	Up
RTN4R	-1.154	2.22841	-6.19298	2.3e-09	3.38e-08	Down
BST2	1.20687	7.97063	6.17337	2.56e-09	3.73e-08	Up
NAV2	-1.10078	4.03073	-6.16336	2.7e-09	3.91e-08	Down
PIFO	-1.11364	1.7231	-6.13791	3.11e-09	4.43e-08	Down
EMILIN3	-1.63834	2.30351	-6.12743	3.29e-09	4.66e-08	Down
RIMS3	-1.15365	2.12833	-6.12309	3.37e-09	4.75e-08	Down
MAPK10	-1.30319	2.15337	-6.12044	3.42e-09	4.81e-08	Down
TMEM176A	1.31329	6.08422	6.11846	3.46e-09	4.86e-08	Up
VMO1	1.07472	4.37986	6.11667	3.5e-09	4.89e-08	Up
ACKR1	1.58182	3.62889	6.11457	3.54e-09	4.94e-08	Up
KCNH2	-1.94728	3.22881	-6.0724	4.45e-09	6.09e-08	Down
BEND5	-1.15468	3.48461	-6.07177	4.47e-09	6.1e-08	Down
ANXA1	1.02191	7.79165	6.06384	4.67e-09	6.34e-08	Up
SLC2A5	1.14073	2.97963	6.05149	4.99e-09	6.72e-08	Up
IL6	1.22891	2.29888	6.04664	5.12e-09	6.88e-08	Up
AIM2	1.43781	2.45684	6.04213	5.25e-09	7.03e-08	Up
HMOX1	1.00604	6.60728	6.03901	5.34e-09	7.13e-08	Up
PODN	1.50701	5.21752	6.03407	5.49e-09	7.3e-08	Up
NNMT	1.39769	7.44601	6.00266	6.5e-09	8.52e-08	Up
KANK2	-1.02899	7.59722	-5.99262	6.87e-09	8.92e-08	Down
SPOCK2	1.01481	3.95081	5.99189	6.89e-09	8.95e-08	Up
SCARA5	2.19209	3.44059	5.96822	7.83e-09	1.01e-07	Up
DCN	2.14924	7.19046	5.96116	8.14e-09	1.04e-07	Up
GNAZ	-1.33758	3.62723	-5.95913	8.22e-09	1.05e-07	Down
STEAP4	1.33864	3.14003	5.95926	8.22e-09	1.05e-07	Up
AFF3	-1.00025	2.06622	-5.94897	8.69e-09	1.1e-07	Down
CD1C	1.03098	1.96542	5.94033	9.1e-09	1.15e-07	Up
S100A10	1.05462	9.07785	5.93885	9.17e-09	1.15e-07	Up
DCX	-1.45981	1.13702	-5.92153	1.01e-08	1.25e-07	Down
LYVE1	1.5752	4.32242	5.91304	1.05e-08	1.31e-07	Up
TMSB15A	-1.32756	4.45793	-5.90675	1.09e-08	1.34e-07	Down
VLDLR	-1.15661	3.30687	-5.90752	1.08e-08	1.34e-07	Down
PIANP	-1.27437	1.83433	-5.90311	1.11e-08	1.37e-07	Down
AKAP1	-1.06431	5.24941	-5.88673	1.21e-08	1.47e-07	Down
TPPP3	1.11581	4.90509	5.86886	1.33e-08	1.6e-07	Up
CD248	1.61655	8.14201	5.86544	1.36e-08	1.62e-07	Up
CCL18	1.74365	2.72949	5.86049	1.39e-08	1.66e-07	Up
CSRP2	-1.38462	4.43704	-5.85866	1.41e-08	1.67e-07	Down
CAPN6	-2.34318	3.78171	-5.85646	1.42e-08	1.69e-07	Down
PTN	-1.73624	6.78788	-5.85237	1.46e-08	1.72e-07	Down
LEFTY2	-1.55805	1.95048	-5.84548	1.51e-08	1.78e-07	Down
SBK1	-1.11979	2.19423	-5.84449	1.52e-08	1.79e-07	Down
CFB	1.07224	2.76299	5.83742	1.58e-08	1.85e-07	Up
MAPK4	-1.32974	1.59064	-5.82672	1.67e-08	1.95e-07	Down
MLLT11	-1.07476	4.67744	-5.81737	1.75e-08	2.02e-07	Down
TFPI	1.17193	3.72195	5.81795	1.75e-08	2.02e-07	Up
FAM184A	-1.05888	2.14002	-5.80457	1.88e-08	2.15e-07	Down
HLA-DQA2	1.66604	4.5101	5.79705	1.95e-08	2.23e-07	Up
PDCD1LG2	1.03894	3.63262	5.79284	1.99e-08	2.27e-07	Up
PALM3	-1.08518	1.82941	-5.78219	2.11e-08	2.39e-07	Down
SMOC1	-1.85003	3.45494	-5.77171	2.23e-08	2.5e-07	Down
IGFBPL1	-1.59984	2.06785	-5.7708	2.24e-08	2.51e-07	Down
SVIL	-1.16318	5.5919	-5.76674	2.29e-08	2.56e-07	Down
CD55	1.05053	5.55886	5.76222	2.34e-08	2.62e-07	Up
RHBDL3	-1.04331	2.13044	-5.76095	2.36e-08	2.63e-07	Down
GRIK5	-1.53964	1.95296	-5.75658	2.41e-08	2.68e-07	Down
PLAAT4	1.07272	6.51272	5.74933	2.51e-08	2.77e-07	Up
PRKAA2	-1.06303	1.66275	-5.74409	2.58e-08	2.84e-07	Down
PLAUR	1.18131	5.18507	5.74268	2.6e-08	2.86e-07	Up
MRAP2	-1.1541	2.13319	-5.72826	2.8e-08	3.06e-07	Down
EMILIN2	1.16166	5.42394	5.72685	2.82e-08	3.08e-07	Up
FAT3	-1.06512	1.65059	-5.72572	2.84e-08	3.09e-07	Down
ADCY5	-1.56404	2.53924	-5.71506	3e-08	3.25e-07	Down
EBF4	-1.09202	3.65582	-5.70345	3.19e-08	3.42e-07	Down
PALLD	-1.10348	6.65979	-5.69908	3.26e-08	3.48e-07	Down
TNXB	1.68367	3.68372	5.69757	3.29e-08	3.5e-07	Up
FGL2	1.11119	4.943	5.68772	3.46e-08	3.67e-07	Up
FAM241B	-1.1048	2.82039	-5.68292	3.55e-08	3.75e-07	Down
EDNRA	-1.20547	5.15761	-5.67564	3.68e-08	3.89e-07	Down
UNC5D	-1.04365	0.814074	-5.65635	4.07e-08	4.26e-07	Down
DCAF12L2	-1.30335	2.29648	-5.65502	4.1e-08	4.28e-07	Down
SEPTIN3	-1.3018	2.48623	-5.63715	4.5e-08	4.63e-07	Down
C8orf88	-1.20563	4.53332	-5.63686	4.5e-08	4.63e-07	Down
XPNPEP2	1.69891	3.16183	5.59471	5.6e-08	5.62e-07	Up
LDOC1	-1.50721	6.4147	-5.59297	5.65e-08	5.66e-07	Down
REEP2	-1.282	3.29845	-5.57353	6.24e-08	6.2e-07	Down
PLAC9	1.5811	5.23991	5.55629	6.82e-08	6.7e-07	Up
MPP7	-1.21777	2.13183	-5.54453	7.24e-08	7.07e-07	Down
IGSF9B	-1.07908	1.61548	-5.54184	7.34e-08	7.15e-07	Down
FAM83D	-1.09465	5.11061	-5.53191	7.72e-08	7.47e-07	Down
ADAMTS2	1.2137	5.76697	5.53127	7.75e-08	7.49e-07	Up
COL4A6	-1.48609	1.83345	-5.53025	7.79e-08	7.51e-07	Down
CCN5	1.73545	3.8716	5.52741	7.9e-08	7.59e-07	Up
PDE3A	-1.19778	3.48274	-5.52038	8.19e-08	7.81e-07	Down
LRRC32	1.07344	5.71394	5.5193	8.24e-08	7.85e-07	Up
RAB9B	-1.29133	3.097	-5.51874	8.26e-08	7.86e-07	Down
MT1F	1.04082	2.99493	5.51906	8.25e-08	7.86e-07	Up
EPHB1	-1.07335	2.27549	-5.51134	8.58e-08	8.12e-07	Down
NT5E	1.06142	5.53941	5.50924	8.67e-08	8.2e-07	Up
C1orf226	-1.13891	2.44908	-5.50379	8.91e-08	8.4e-07	Down
MEIS1	-1.02669	3.2603	-5.49403	9.36e-08	8.76e-07	Down
PTPRF	-1.1324	4.77341	-5.49232	9.45e-08	8.82e-07	Down
NCAM1	-1.45812	4.19734	-5.48408	9.85e-08	9.17e-07	Down
CXADR	-1.01444	1.5149	-5.47034	1.06e-07	9.8e-07	Down
RGS1	1.2178	4.47586	5.4586	1.12e-07	1.03e-06	Up
CXCL12	1.12881	6.39539	5.45041	1.17e-07	1.07e-06	Up
MKX	-1.23882	2.14547	-5.44554	1.2e-07	1.09e-06	Down
SERTM2	-2.22061	2.28541	-5.40364	1.48e-07	1.31e-06	Down
GPRASP1	-1.03695	3.40795	-5.39751	1.52e-07	1.35e-06	Down
GFPT2	1.13762	5.62109	5.3915	1.57e-07	1.38e-06	Up
CCL26	1.16141	2.50749	5.37181	1.73e-07	1.52e-06	Up
SNAP25	-1.33502	2.91383	-5.36894	1.76e-07	1.54e-06	Down
GABBR2	-1.53156	1.57005	-5.36014	1.84e-07	1.6e-06	Down
ISYNA1	-1.10131	5.71283	-5.35975	1.84e-07	1.6e-06	Down
LUM	2.07069	7.92376	5.35924	1.84e-07	1.6e-06	Up
METTL24	-1.0679	1.49173	-5.35453	1.89e-07	1.63e-06	Down
PI16	1.90741	2.55857	5.34142	2.02e-07	1.73e-06	Up
WNT2	1.38469	1.76466	5.33849	2.04e-07	1.75e-06	Up
SLMAP	-1.08142	4.4345	-5.31977	2.24e-07	1.89e-06	Down
RAC3	-1.0696	4.32642	-5.30703	2.39e-07	2e-06	Down
PTGES3L	-1.06039	1.53796	-5.3041	2.42e-07	2.02e-06	Down
PBX1	-1.09869	4.28996	-5.29536	2.53e-07	2.1e-06	Down
SORBS1	-1.64473	3.85581	-5.28729	2.63e-07	2.17e-06	Down
PI15	-1.55446	3.1225	-5.28579	2.65e-07	2.18e-06	Down
S100B	1.13509	2.1194	5.28347	2.69e-07	2.2e-06	Up
ARL4C	1.13508	6.00587	5.26871	2.89e-07	2.34e-06	Up
CSDC2	-1.48419	2.73364	-5.26746	2.91e-07	2.36e-06	Down
PAWR	-1.0797	3.17727	-5.21451	3.77e-07	2.95e-06	Down
APLNR	1.05553	4.53215	5.21355	3.78e-07	2.96e-06	Up
GNG4	-1.15355	2.56558	-5.21215	3.81e-07	2.97e-06	Down
PCYT1B	-1.01206	1.70649	-5.20058	4.03e-07	3.12e-06	Down
EFEMP1	1.39633	5.91573	5.19929	4.06e-07	3.13e-06	Up
KLHL38	-1.0754	1.69406	-5.19709	4.1e-07	3.16e-06	Down
HSPB7	-1.6285	4.01071	-5.19454	4.15e-07	3.2e-06	Down
ACTN1	-1.07136	7.1107	-5.18663	4.31e-07	3.3e-06	Down
ADH1B	1.52915	2.00205	5.18701	4.31e-07	3.3e-06	Up
OASL	1.08939	3.45934	5.15761	4.97e-07	3.74e-06	Up
SUSD4	-1.05598	2.14951	-5.13227	5.61e-07	4.16e-06	Down
CKMT2	-1.35315	2.41754	-5.13071	5.66e-07	4.18e-06	Down
LAG3	1.00205	3.04377	5.12775	5.74e-07	4.24e-06	Up
NTN4	1.10594	4.58564	5.12444	5.83e-07	4.3e-06	Up
TMOD1	-1.52018	3.34974	-5.12339	5.86e-07	4.32e-06	Down
HOXC13	-1.31433	2.04219	-5.12268	5.88e-07	4.33e-06	Down
HEY2	-1.19989	3.66244	-5.12202	5.9e-07	4.34e-06	Down
PNCK	-1.06278	1.39577	-5.10185	6.5e-07	4.72e-06	Down
NRK	-1.05326	1.75655	-5.10134	6.51e-07	4.73e-06	Down
MYH10	-1.00977	5.69539	-5.09987	6.56e-07	4.76e-06	Down
SHROOM3	-1.04125	2.04933	-5.09716	6.65e-07	4.81e-06	Down
SLC7A3	-1.40174	1.59243	-5.09436	6.74e-07	4.86e-06	Down
PMAIP1	-1.1777	4.12081	-5.08096	7.18e-07	5.14e-06	Down
GPR1	1.16337	2.71801	5.07685	7.33e-07	5.23e-06	Up
PROM1	-1.13546	1.23656	-5.06976	7.58e-07	5.38e-06	Down
CHODL	-1.079	1.21412	-5.06277	7.84e-07	5.54e-06	Down
SLC47A1	-1.0652	2.36012	-5.05701	8.05e-07	5.68e-06	Down
MXRA8	1.16908	7.70572	5.05578	8.1e-07	5.71e-06	Up
BCHE	-1.57747	3.48588	-5.0552	8.12e-07	5.72e-06	Down
RASL11B	-1.36081	3.38154	-5.05194	8.25e-07	5.79e-06	Down
FBXL22	-1.37878	2.54242	-5.04927	8.36e-07	5.85e-06	Down
GAS7	1.10994	4.75019	5.04957	8.35e-07	5.85e-06	Up
KCNG1	-1.17736	3.11509	-5.04533	8.51e-07	5.95e-06	Down
MEX3A	-1.03145	2.71024	-5.03822	8.81e-07	6.13e-06	Down
CDH3	-1.49673	2.86584	-5.03301	9.03e-07	6.26e-06	Down
PCOLCE	1.12842	8.39595	5.029	9.2e-07	6.37e-06	Up
SUSD5	-1.31701	2.92747	-5.01834	9.68e-07	6.65e-06	Down
IL17RD	-1.01302	3.58476	-5.0063	1.02e-06	6.99e-06	Down
PCDH10	-1.18877	1.68406	-4.97898	1.17e-06	7.84e-06	Down
ANO1	-1.14865	3.7033	-4.97774	1.17e-06	7.87e-06	Down
IL20RB	1.0514	2.5636	4.97542	1.19e-06	7.93e-06	Up
MYOCD	-1.76521	2.23237	-4.96727	1.23e-06	8.21e-06	Down
TNFAIP6	1.44363	4.47946	4.96664	1.24e-06	8.23e-06	Up
LMO1	-1.38165	1.55961	-4.96384	1.25e-06	8.32e-06	Down
MT2A	1.01886	8.9532	4.95739	1.29e-06	8.55e-06	Up
PTX3	1.49585	5.15038	4.95476	1.31e-06	8.65e-06	Up
LRRC4B	-1.22698	2.69552	-4.9382	1.41e-06	9.26e-06	Down
TMEM108	-1.01439	2.71764	-4.92499	1.5e-06	9.78e-06	Down
PNMA8A	-1.05164	4.4152	-4.90433	1.65e-06	1.06e-05	Down
KCNQ4	-1.04007	1.77397	-4.90292	1.67e-06	1.07e-05	Down
SYNM	-1.45497	4.79997	-4.89934	1.69e-06	1.09e-05	Down
PCP4	-2.10292	2.65243	-4.88702	1.79e-06	1.14e-05	Down
ABCA9	1.16784	1.92797	4.8778	1.87e-06	1.18e-05	Up
HAND2	-1.48844	3.56452	-4.87516	1.9e-06	1.19e-05	Down
CTXN1	-1.21688	4.21509	-4.87562	1.89e-06	1.19e-05	Down
AOX1	1.20329	3.47391	4.87431	1.9e-06	1.19e-05	Up
NRTN	-1.05891	2.26467	-4.859	2.04e-06	1.27e-05	Down
ADAMTS5	1.21325	4.07988	4.85203	2.11e-06	1.3e-05	Up
MYOC	-1.79338	2.54507	-4.85182	2.11e-06	1.31e-05	Down
ADH1C	1.36297	1.96429	4.85154	2.11e-06	1.31e-05	Up
C3orf70	-1.12813	3.55286	-4.84404	2.19e-06	1.34e-05	Down
NXPH4	-1.22066	3.43295	-4.82348	2.41e-06	1.46e-05	Down
AR	-1.08973	2.62123	-4.82279	2.41e-06	1.46e-05	Down
TMEM98	-1.0996	4.64197	-4.81514	2.5e-06	1.5e-05	Down
RASD2	-1.24197	3.51156	-4.81343	2.52e-06	1.51e-05	Down
REEP1	-1.22205	2.93878	-4.80858	2.58e-06	1.54e-05	Down
LRRN1	-1.28189	2.52818	-4.80388	2.63e-06	1.57e-05	Down
PGM5	-1.52262	4.1378	-4.7995	2.69e-06	1.59e-05	Down
WNT10B	1.14253	2.00572	4.79105	2.79e-06	1.65e-05	Up
PLA2G5	1.0366	2.18178	4.78929	2.82e-06	1.66e-05	Up
MATN2	-1.04584	5.40569	-4.7878	2.83e-06	1.67e-05	Down
UBE2QL1	-1.04549	2.16398	-4.77948	2.94e-06	1.72e-05	Down
NPNT	-1.23806	3.95883	-4.76577	3.13e-06	1.82e-05	Down
TNFSF9	1.02165	2.99689	4.75888	3.23e-06	1.86e-05	Up
FBXO32	-1.2735	5.69721	-4.75437	3.3e-06	1.89e-05	Down
EEF1A2	-1.66736	3.30799	-4.75081	3.36e-06	1.92e-05	Down
PLIN4	-1.46955	2.8242	-4.72453	3.78e-06	2.13e-05	Down
MYLK	-1.76024	5.2748	-4.72222	3.82e-06	2.15e-05	Down
CADM3	1.50196	2.95704	4.71924	3.87e-06	2.18e-05	Up
PEG10	-1.21917	4.5438	-4.70476	4.13e-06	2.3e-05	Down
PPP1R3C	-1.01764	4.93255	-4.69555	4.31e-06	2.39e-05	Down
CFH	1.07416	4.7607	4.68624	4.49e-06	2.48e-05	Up
HOXB13	-1.13804	1.36223	-4.67955	4.63e-06	2.55e-05	Down
ALPL	1.3107	5.04397	4.67643	4.7e-06	2.58e-05	Up
LHX2	-1.10967	2.50183	-4.66304	4.99e-06	2.71e-05	Down
CACNG4	-1.2991	2.90554	-4.66094	5.04e-06	2.74e-05	Down
TREM2	1.0167	4.76235	4.64326	5.45e-06	2.93e-05	Up
CTSG	1.32571	2.60981	4.60954	6.33e-06	3.32e-05	Up
OSTN	-1.1313	0.858874	-4.58294	7.13e-06	3.67e-05	Down
IL17B	-1.41702	2.69767	-4.58168	7.17e-06	3.68e-05	Down
ALDH1B1	-1.11678	6.67574	-4.5775	7.3e-06	3.74e-05	Down
APLP1	-1.00707	4.09036	-4.56756	7.63e-06	3.89e-05	Down
FDCSP	1.05159	1.28763	4.5647	7.73e-06	3.93e-05	Up
GNAO1	-1.12845	2.66825	-4.56152	7.83e-06	3.98e-05	Down
TMEM119	1.34131	5.1577	4.55241	8.16e-06	4.12e-05	Up
RCN3	1.02757	7.68974	4.53087	8.97e-06	4.46e-05	Up
TCEAL2	-1.65261	2.99663	-4.50735	9.94e-06	4.88e-05	Down
CHRDL2	-1.84072	3.49199	-4.50632	9.98e-06	4.89e-05	Down
TSPAN2	-1.26506	3.47207	-4.49171	1.06e-05	5.16e-05	Down
PPP1R12B	-1.47558	4.41849	-4.48915	1.08e-05	5.21e-05	Down
NIBAN1	-1.00588	5.89431	-4.46828	1.18e-05	5.64e-05	Down
MGARP	-1.00633	2.09651	-4.46819	1.18e-05	5.65e-05	Down
ITGB1BP2	-1.03444	1.9305	-4.46412	1.2e-05	5.74e-05	Down
PEG3	-1.00719	1.76182	-4.46282	1.21e-05	5.76e-05	Down
B4GALNT4	-1.19594	2.60597	-4.43762	1.35e-05	6.33e-05	Down
CD70	1.1171	3.00804	4.39572	1.61e-05	7.41e-05	Up
SLPI	1.43863	3.33469	4.38468	1.69e-05	7.72e-05	Up
ACP5	1.09687	4.94827	4.37647	1.75e-05	7.97e-05	Up
PRG4	1.4389	2.41722	4.36777	1.82e-05	8.23e-05	Up
NKX2-5	-1.06447	1.47998	-4.3672	1.82e-05	8.24e-05	Down
WFDC2	-1.57066	3.31709	-4.35687	1.9e-05	8.56e-05	Down
CA12	-1.21417	4.40067	-4.32391	2.19e-05	9.69e-05	Down
RAMP1	-1.54911	4.81701	-4.28765	2.55e-05	0.000110804	Down
HEPH	-1.20064	3.98065	-4.28736	2.55e-05	0.00011091	Down
TPSAB1	1.30357	3.4231	4.28643	2.56e-05	0.000111275	Up
SERPINE1	1.1472	6.74602	4.27782	2.66e-05	0.000114664	Up
MORN5	-1.03755	1.41292	-4.27208	2.72e-05	0.000117035	Down
PI3	1.16822	1.87268	4.26263	2.83e-05	0.000121151	Up
MXRA5	1.28198	5.97354	4.25693	2.9e-05	0.000123485	Up
HOXC12	-1.16062	1.498	-4.25419	2.93e-05	0.000124754	Down
FHL1	-1.01715	7.10523	-4.2381	3.13e-05	0.000132263	Down
MYH11	-2.22818	4.95908	-4.22722	3.28e-05	0.000137537	Down
MMP2	1.10206	9.18093	4.1916	3.8e-05	0.000156451	Up
PLXNA4	-1.08301	2.97932	-4.18739	3.87e-05	0.000158926	Down
TWIST2	1.04786	4.85596	4.186	3.89e-05	0.00015969	Up
DEFB1	1.16074	1.81577	4.17566	4.06e-05	0.00016545	Up
CNN1	-1.83687	6.40622	-4.13091	4.88e-05	0.000193918	Down
PRUNE2	-1.23673	4.47984	-4.12974	4.9e-05	0.000194706	Down
SCX	-1.22471	3.22245	-4.12581	4.98e-05	0.000197621	Down
SCUBE3	-1.08288	2.10908	-4.11897	5.12e-05	0.000202628	Down
NIPAL4	-1.03501	1.78568	-4.11233	5.26e-05	0.000207239	Down
SEZ6L2	-1.15187	4.28679	-4.09659	5.61e-05	0.000218591	Down
TPSB2	1.24028	3.26437	4.08975	5.76e-05	0.000223983	Up
STAC2	-1.12737	2.61893	-4.08299	5.92e-05	0.000229369	Down
JPH2	-1.50454	3.76181	-4.07084	6.22e-05	0.000239191	Down
ACAN	-1.2407	3.04787	-4.04877	6.8e-05	0.000259132	Down
ALDH1A1	1.00622	4.87242	3.99239	8.52e-05	0.000315076	Up
PLPP4	-1.25672	2.48297	-3.9916	8.55e-05	0.000315973	Down
SRPX2	1.00231	5.16077	3.98549	8.75e-05	0.000322639	Up
HSPB3	-1.45132	2.87929	-3.98302	8.84e-05	0.000325348	Down
ECM1	1.00326	6.25537	3.95565	9.85e-05	0.00035715	Up
BARX1	-1.03933	1.47032	-3.93599	0.000106443	0.000381611	Down
SLC22A3	-1.15962	3.44332	-3.92402	0.000111566	0.000397235	Down
CPA3	1.14674	3.41202	3.88417	0.000130341	0.000454551	Up
OGN	-1.46279	4.65531	-3.86724	0.000139196	0.000481997	Down
TMEM59L	-1.03188	2.63036	-3.8432	0.000152749	0.000520312	Down
CA3	-1.24004	2.44323	-3.8388	0.000155363	0.000528166	Down
RASL12	-1.21078	5.2867	-3.78601	0.000190186	0.000629327	Down
DPT	1.4089	6.1653	3.75424	0.000214571	0.000696311	Up
CRTAC1	-1.13676	3.05015	-3.7525	0.00021599	0.000700045	Down
PCSK1N	-1.17867	2.85933	-3.75071	0.00021746	0.000704218	Down
PDPN	1.2289	4.75817	3.74533	0.000221932	0.000716671	Up
VGLL3	1.00478	3.98013	3.74091	0.000225666	0.000728179	Up
NTN1	-1.01825	4.03755	-3.70695	0.000256407	0.000815705	Down
SLC24A3	-1.15973	3.74777	-3.68127	0.000282231	0.000888953	Down
KCNMB1	-1.28339	3.25075	-3.67989	0.000283689	0.000892451	Down
TPM2	-1.13347	8.64658	-3.67717	0.000286579	0.000900166	Down
FABP4	1.22932	4.62143	3.64298	0.000325327	0.00100348	Up
VEGFD	1.14721	2.67929	3.63943	0.000329627	0.00101511	Up
ALDH1A3	1.11264	3.87386	3.63054	0.000340623	0.00104522	Up
DES	-2.03133	6.65237	-3.61953	0.000354711	0.00108206	Down
CBLN1	-1.10781	2.09633	-3.52933	0.000492621	0.00143753	Down
PPP1R14A	-1.06681	4.91575	-3.52566	0.000499169	0.00145392	Down
TNC	-1.09376	7.13995	-3.5058	0.000536102	0.00154625	Down
SGCA	-1.19906	3.22539	-3.50307	0.000541364	0.00155986	Down
BEX1	-1.13071	3.07404	-3.50001	0.000547331	0.00157388	Down
ACTG2	-1.70012	6.5631	-3.46687	0.000616029	0.00174883	Down
LMOD1	-1.41466	5.3594	-3.34732	0.000936737	0.0025209	Down
TNNT3	1.10164	3.18576	3.26861	0.00122659	0.00319341	Up
SYNPO2	-1.14867	4.65112	-3.26763	0.00123065	0.00320155	Down
CXCL14	1.19421	3.5464	3.25389	0.00128928	0.00333436	Up
CRABP1	-1.12988	1.73372	-3.19842	0.00155324	0.00392119	Down
GALNT17	-1.00239	4.06307	-3.16189	0.00175355	0.00436135	Down
NPTX2	-1.04336	3.58866	-3.09465	0.00218589	0.00529083	Down
ASB2	-1.07236	3.20036	-3.03792	0.00262494	0.00621403	Down
MAOB	-1.07681	4.04883	-2.98142	0.00314155	0.00726937	Down
MMP9	1.05732	5.92602	2.91793	0.00383221	0.00864353	Up
PLN	-1.17056	4.16661	-2.86658	0.00448931	0.00994634	Down
TAGLN	-1.02276	8.43914	-2.73982	0.00657339	0.0138445	Down
CASQ2	-1.06228	3.09974	-2.72646	0.00683758	0.0143437	Down
RIPK3, receptor interacting serine/threonine kinase 3; TCGA, The Cancer Genome Atlas; logFC, log fold change in RIPK3 higher vs. RIPK3 lower; AveExpr, average expression.
